# Supplementary material for: Spectroscopic investigation of fluorinated phenols as pH-sensitive probes in mixed liposomal systems
Source: Royal Society of Chemistry journal article supplement (doi:10.1039/c4ra01507j), 2014-01-01
Supplement: c4ra01507j1.pdf [file c4ra01507j1.pdf]

Electronic Supplementary Information (ESI)

## **Spectroscopic investigation of fluorinated phenols as pH-sensitive probes in mixed liposomal systems**

Carla Gasbarri, Guido Angelini\*

Dipartimento di Farmacia, Università G. d'Annunzio di Chieti-Pescara, via dei Vestini, 66100  
Chieti, Italy

\* Corresponding author.

E-mail: g.angelini@unich.it (G. Angelini)

Phone: +39-0871-3554785

### **I. Index**

- I. Index
- II. 3FP UV-vis titrations in POPC/DDAB liposomes
- III. 4FP UV-vis spectra and titrations in POPC/DDAB liposomes
- IV. 4FP <sup>19</sup>F-NMR spectra and titration in water
- V. 5FP UV-vis spectra and titrations in POPC/DDAB liposomes
- VI. 5FP <sup>19</sup>F-NMR spectra and titration in water
- VII. Table of the mean size of the liposomal systems measured after extrusion by Dynamic Laser Light Scattering at 25°C.
- VIII. Titration plots of 3FP starting from pH 11 and pH 3.

## II. 3FP UV-vis titrations in POPC/DDAB liposomes

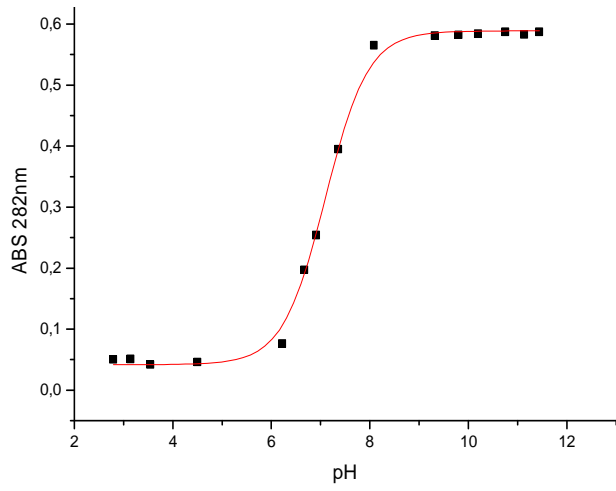

POPC/DDAB 75/25

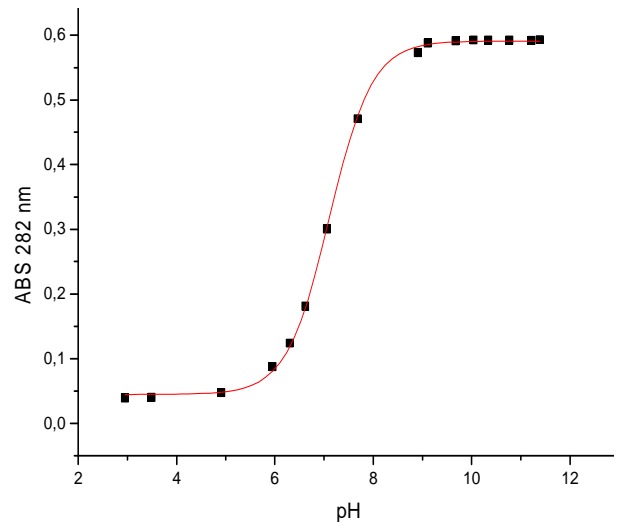

POPC/DDAB 50/50

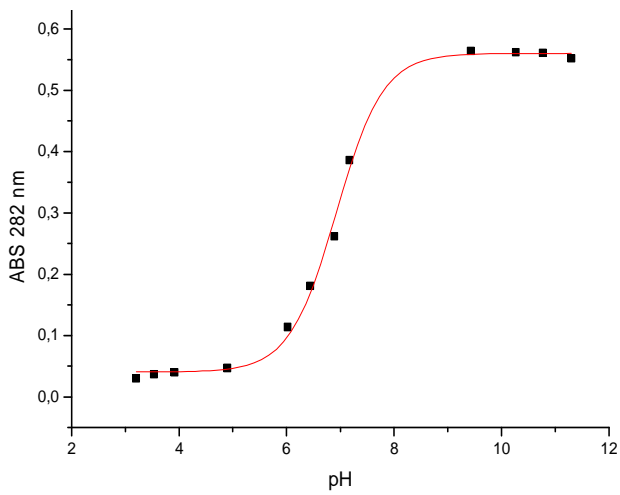

POPC/DDAB 25/75

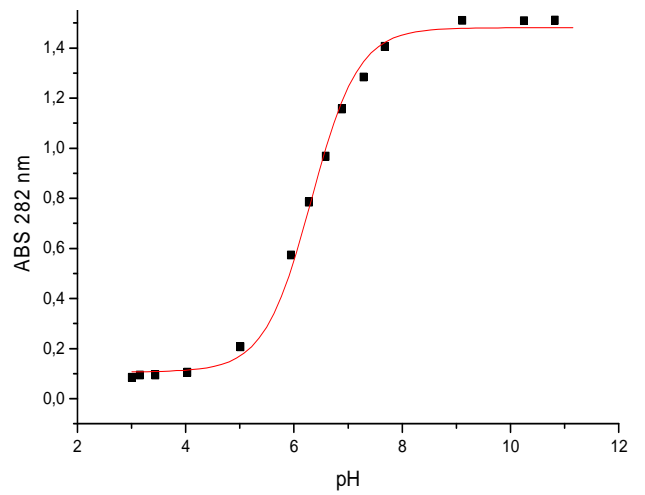

DDAB liposomes

### III. 4FP UV-vis spectra and titrations in POPC/DDAB liposomes

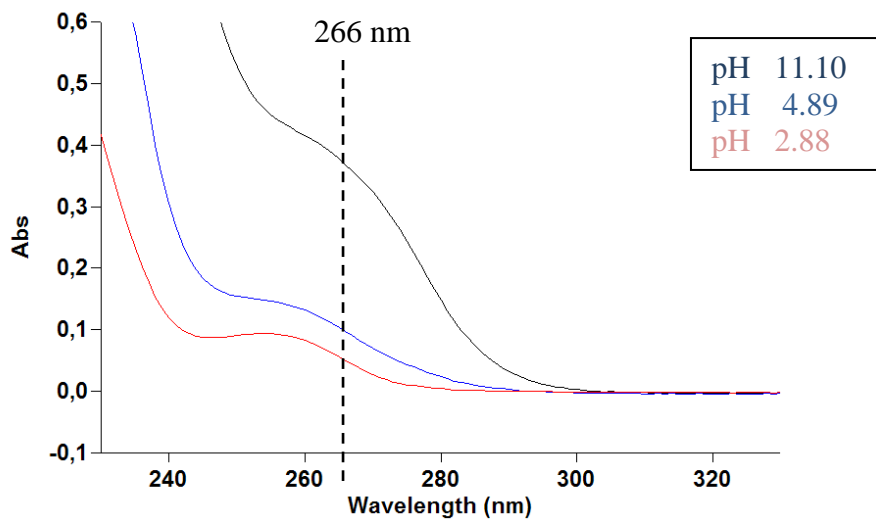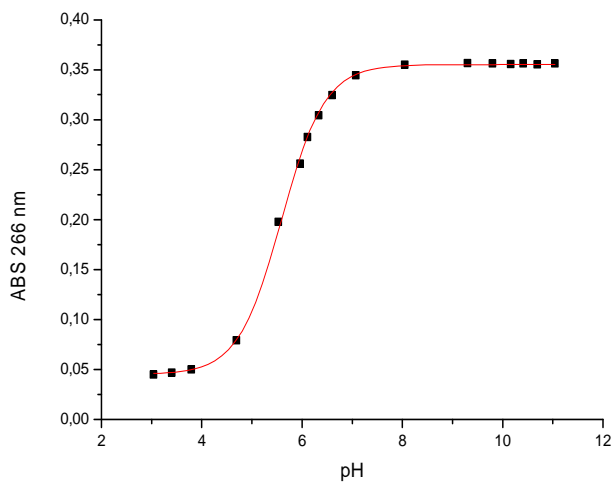

Water

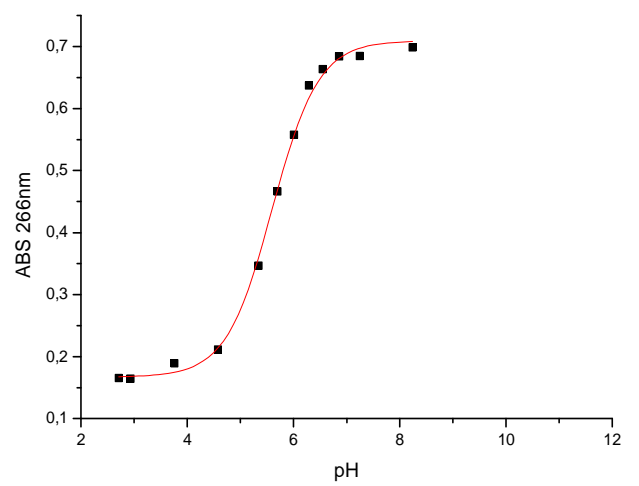

POPC liposomes

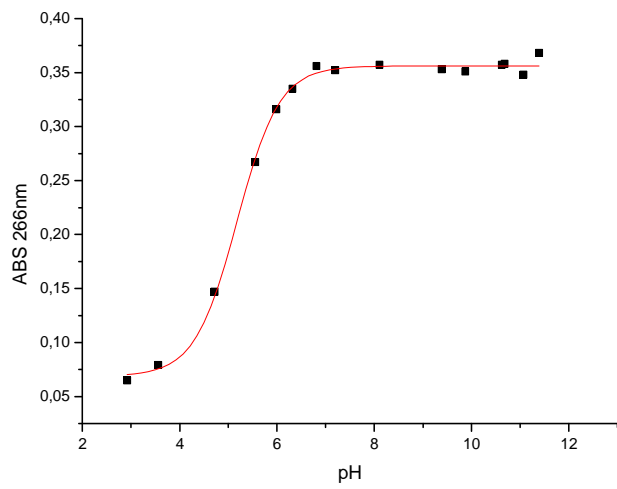

POPC/DDAB 75/25

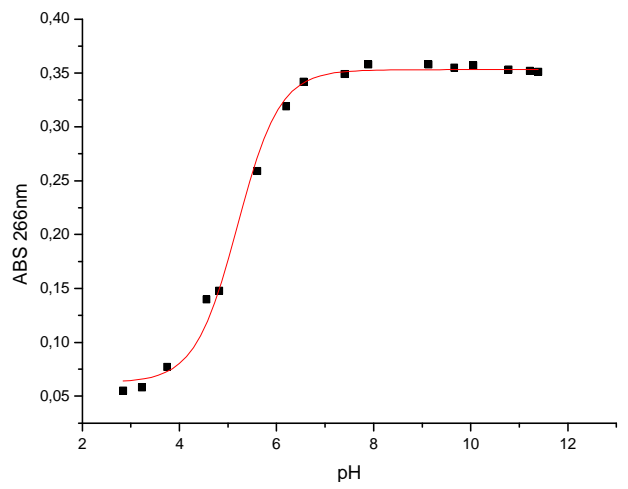

POPC/DDAB 50/50

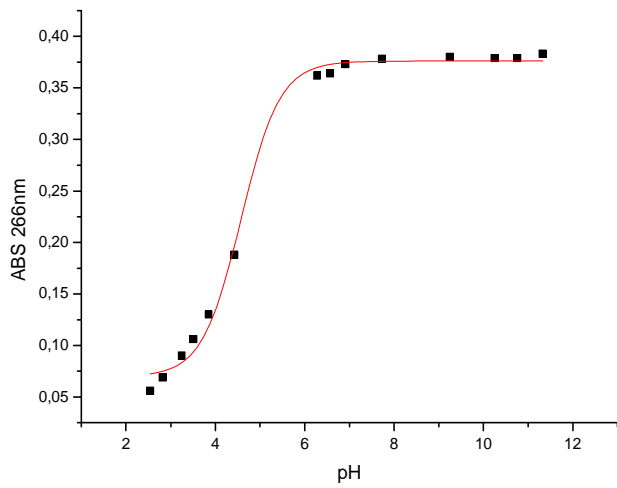

POPC/DDAB 25/75

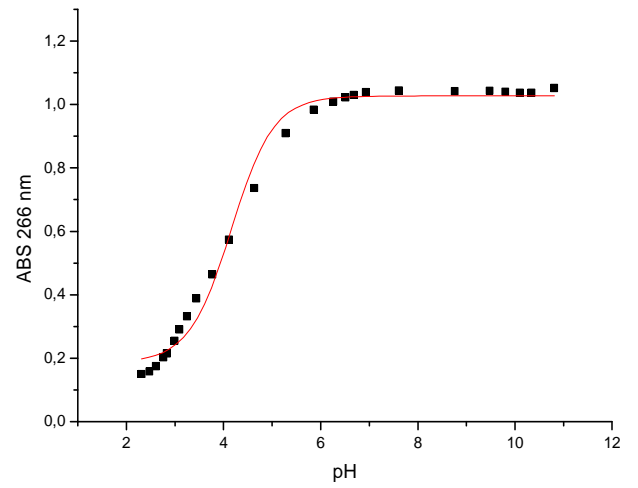

DDAB liposomes

#### IV. 4FP $^{19}\text{F}$ -NMR spectra and titration in water

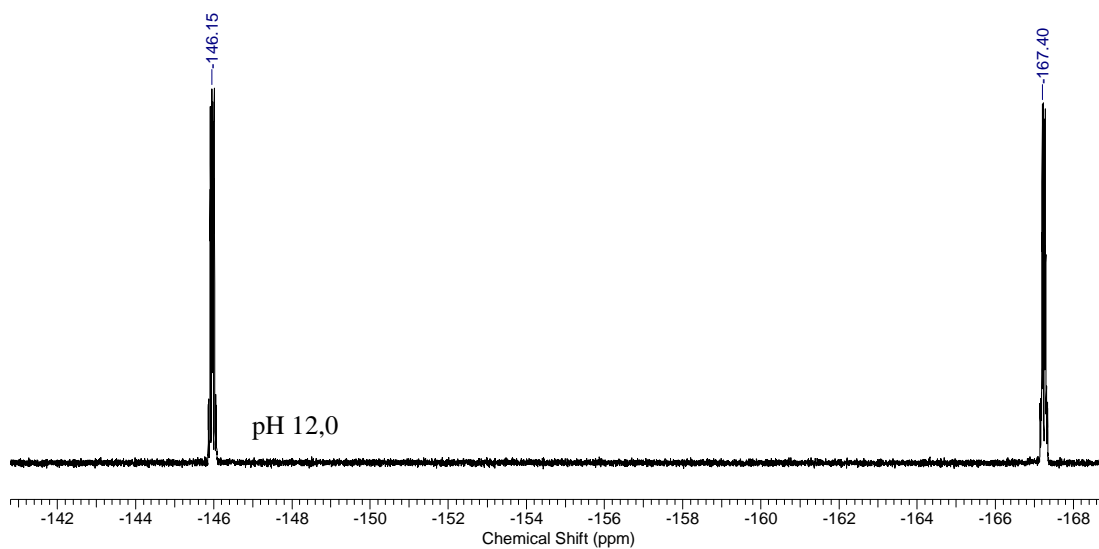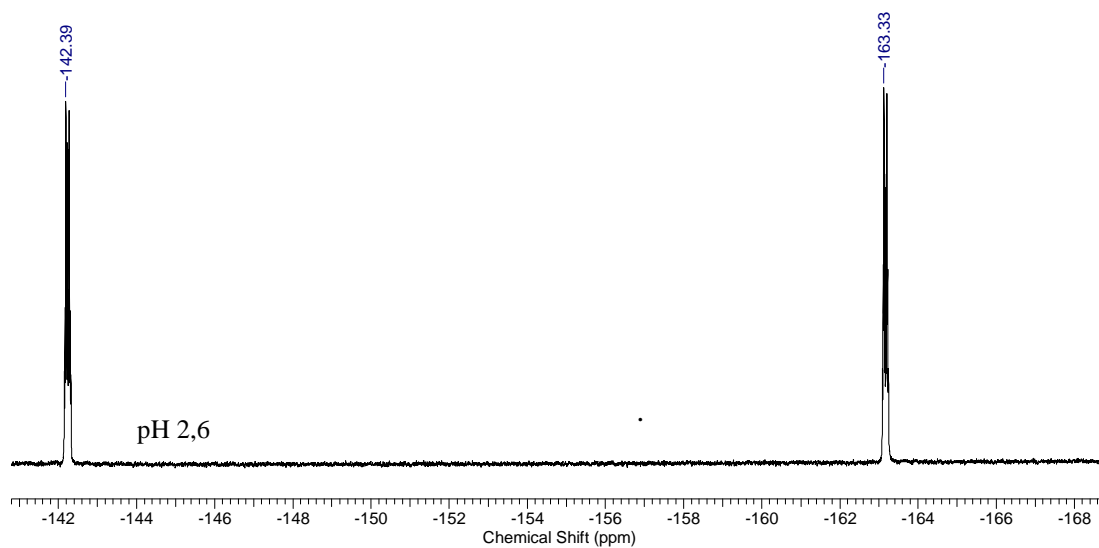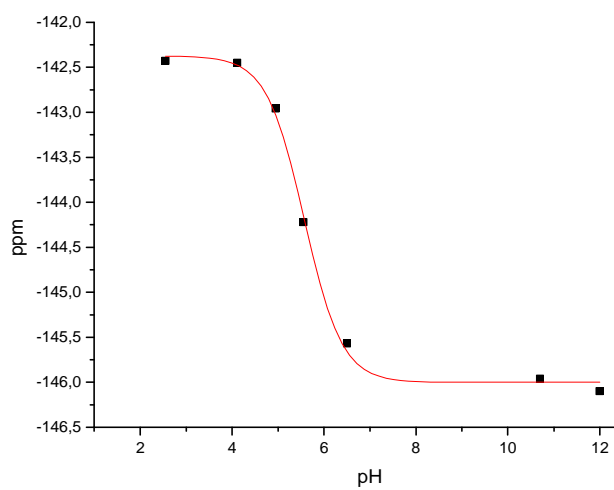

## V. 5FP UV-vis spectra and titrations in POPC/DDAB liposomes

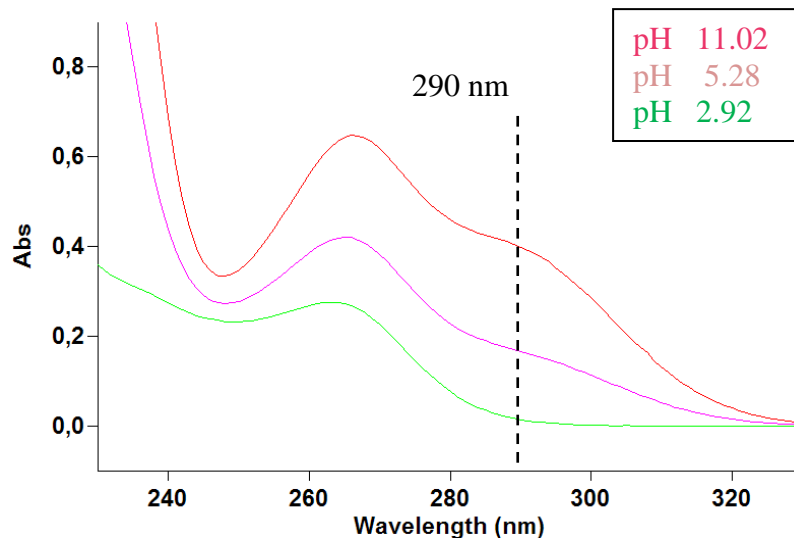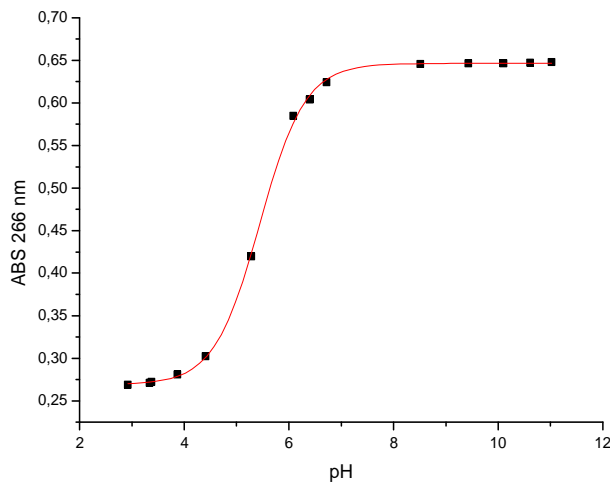

Water

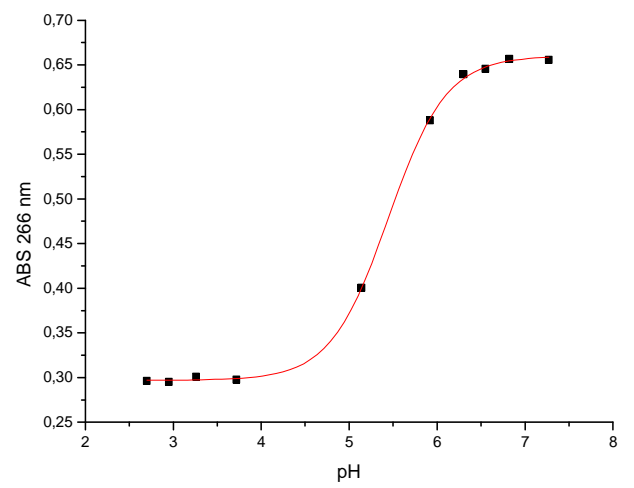

POPC liposomes

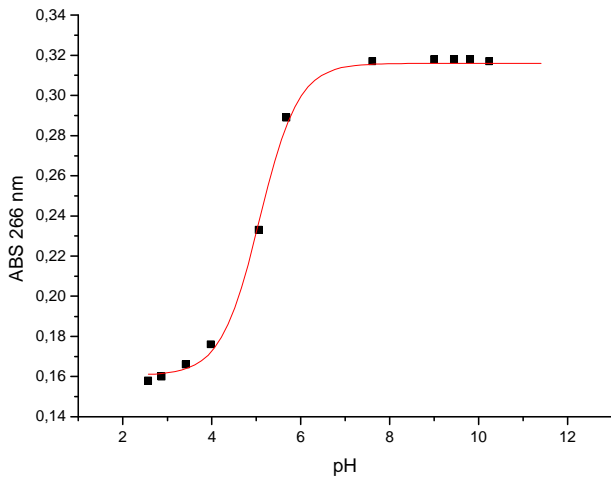

POPC/DDAB 75/25

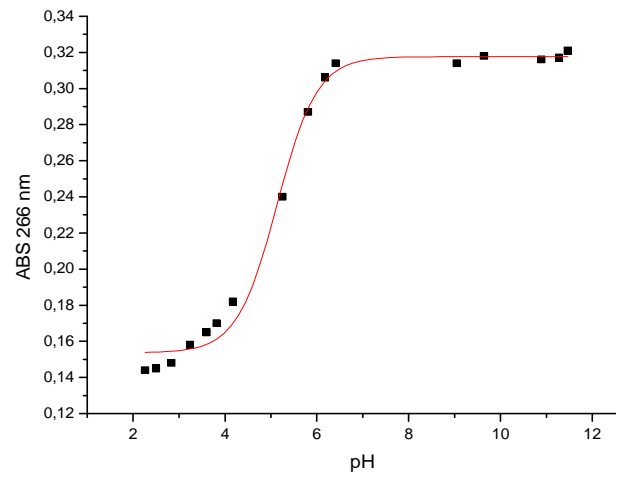

POPC/DDAB 50/50

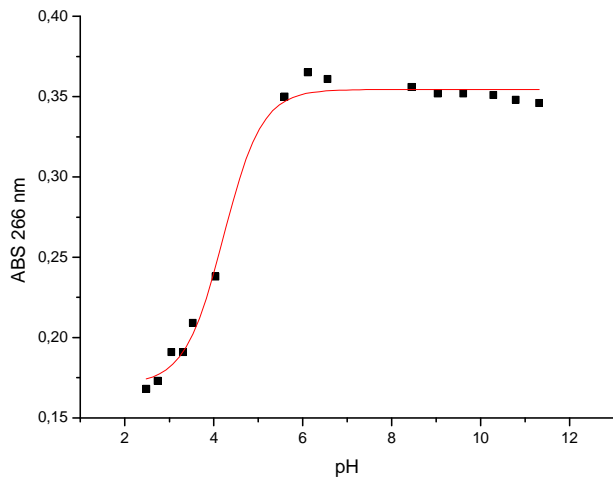

POPC/DDAB 25/75

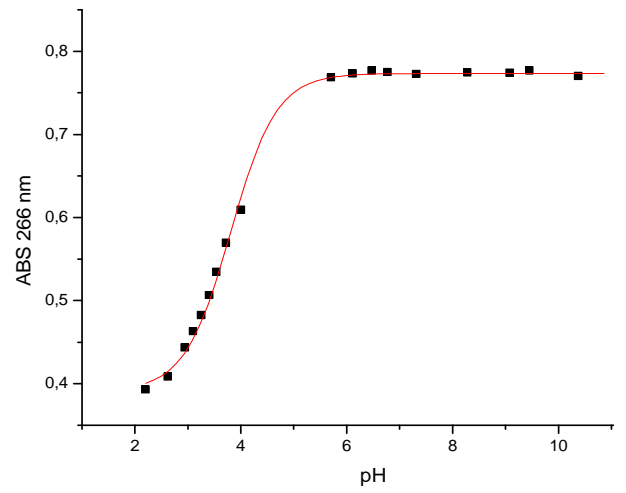

DDAB liposomes

## VI. 5FP $^{19}\text{F}$ -NMR spectra and titration in water

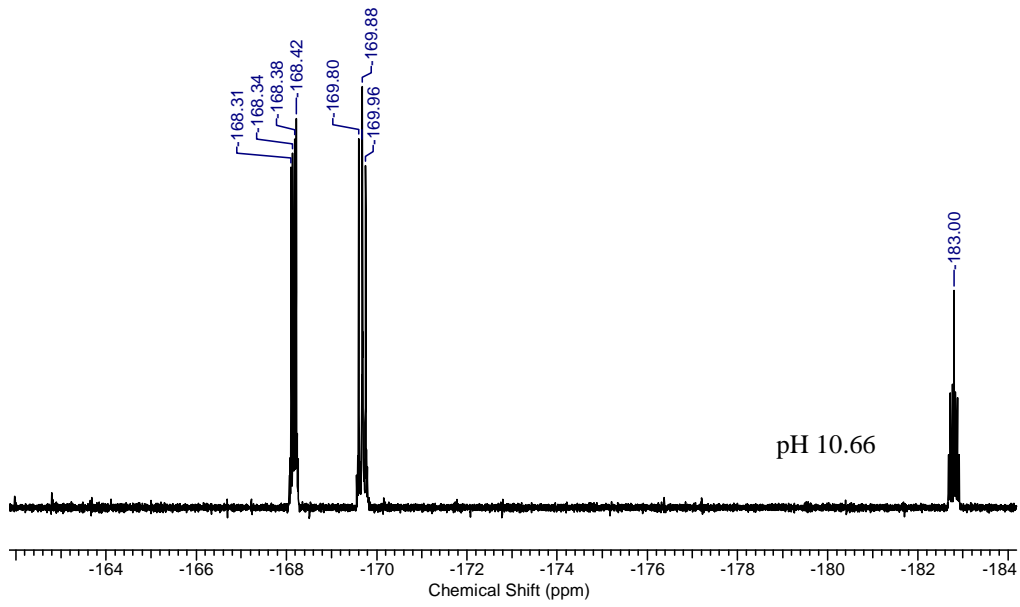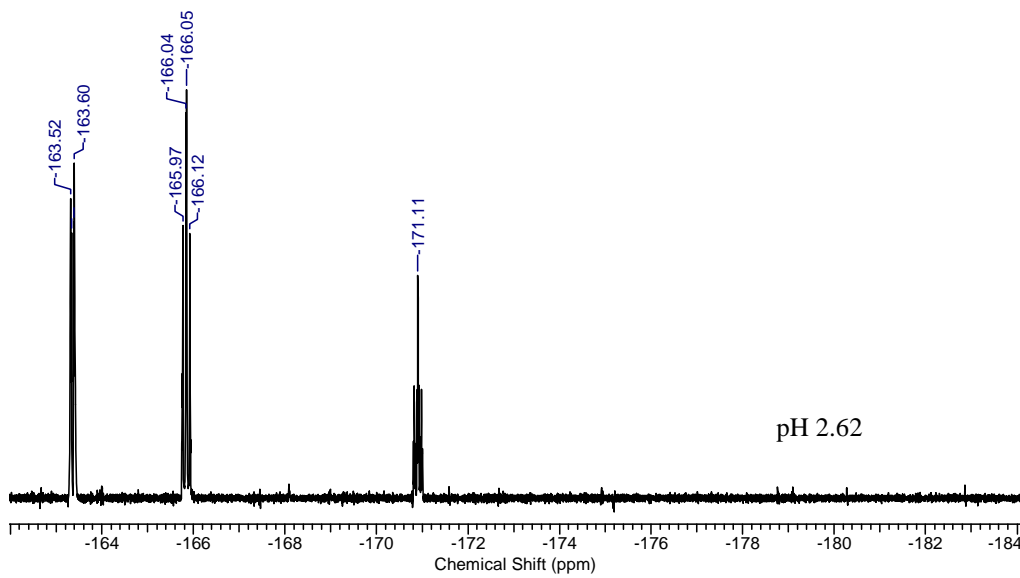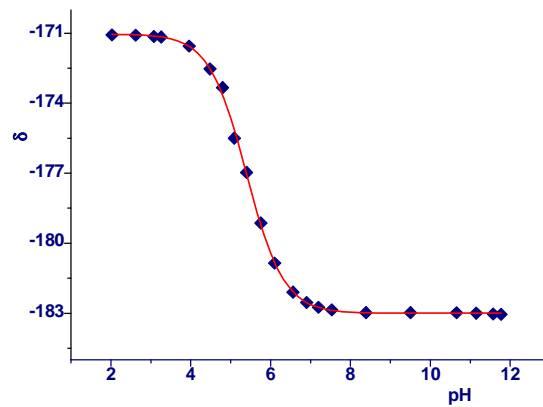



**VII. Table of the mean size of the liposomal systems measured after extrusion by Dynamic Laser Light Scattering at 25°C.**

| System                    | Mean diameter after extrusion / nm |                   |                   |                   |
|---------------------------|------------------------------------|-------------------|-------------------|-------------------|
|                           | -                                  | 3FF               | 4FF               | 5FF               |
| POPC liposomes            | 119 ± 2<br>(0.10)                  | 122 ± 3<br>(0.13) | 122 ± 1<br>(0.18) | 121 ± 1<br>(0.21) |
| POPC/DDAB 75/25 liposomes | 125 ± 2<br>(0.10)                  | 124 ± 1<br>(0.11) | 113 ± 1<br>(0.23) | 124 ± 1<br>(0.14) |
| POPC/DDAB 50/50 liposomes | 126 ± 1<br>(0.15)                  | 119 ± 2<br>(0.19) | 119 ± 2<br>(0.16) | 112 ± 1<br>(0.22) |
| POPC/DDAB 25/75 liposomes | 109 ± 2<br>(0.12)                  | 109 ± 2<br>(0.18) | 110 ± 2<br>(0.10) | 109 ± 1<br>(0.11) |
| DDAB liposomes            | 122 ± 2<br>(0.10)                  | 125 ± 2<br>(0.25) | 126 ± 2<br>(0.13) | 111 ± 3<br>(0.30) |

Polidispersity Index is shown in brackets

### VIII. Titration plots of 3FP starting from pH 11 and pH 3.

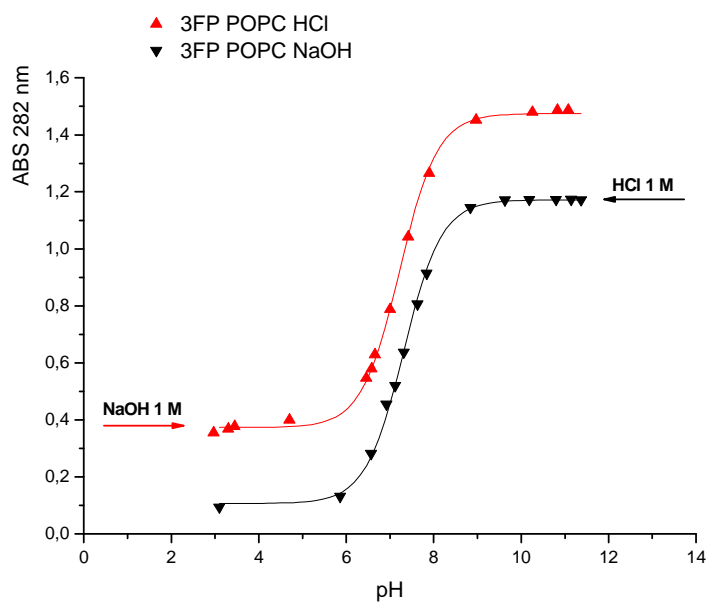

Titration of 3FP in the presence of POPC liposomes prepared in HCl 3.3 mM, adding NaOH 1 M:  $pK_a = 7.22$  (in red), titration of 3FP in the presence of POPC liposomes prepared in NaOH 3.3 mM, adding HCl 1 M:  $pK_a = 7.31$  (in black). The red line is shifted upwards to avoid overlapping with the black line.
